# Supplementary material
Source: PubMed Central journal article supplement (PMC9667770)
Supplement: jcm.00995-22-s0001.pdf [file jcm.00995-22-s0001.pdf]

**Supplemental Table 1.** SARS-CoV-2 U.S. serology standard Collaborative Study panel composition.

| <b>Sample ID</b> | <b>Description</b>                  |
|------------------|-------------------------------------|
| <b>COV1</b>      | <b>U.S. serology standard</b>       |
| <b>COV2</b>      | <b>Subject 9</b>                    |
| <b>COV3</b>      | <b>Pre-COVID-19 Negative Plasma</b> |
| <b>COV4</b>      | <b>U.S. serology standard</b>       |
| <b>COV5</b>      | <b>Subject 6</b>                    |
| <b>COV6</b>      | <b>Subject 4</b>                    |
| <b>COV7</b>      | <b>Pre-COVID-19 Negative Plasma</b> |
| <b>COV8</b>      | <b>Subject 2</b>                    |
| <b>COV9</b>      | <b>Subject 7</b>                    |
| <b>COV10</b>     | <b>Subject 9</b>                    |
| <b>COV11</b>     | <b>Subject 2</b>                    |
| <b>COV12</b>     | <b>Subject 6</b>                    |
| <b>COV13</b>     | <b>COVID-19 Negative Plasma</b>     |
| <b>COV14</b>     | <b>Subject 4</b>                    |
| <b>COV15</b>     | <b>COVID-19 Negative Plasma</b>     |
| <b>COV16</b>     | <b>Subject 7</b>                    |
